# Supplementary material for: Development of a laser-photofragmentation laser-induced fluorescence instrument for the detection of nitrous acid and hydroxyl radicals in the atmosphere
Source: Copernicus journal article supplement (doi:10.5194/amt-14-6039-2021), 2021-09-16
Supplement: Supplementary file 1 [file amt-14-6039-2021-supplement.pdf]

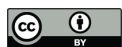

*Supplement of*

## **Development of a laser-photofragmentation laser-induced fluorescence instrument for the detection of nitrous acid and hydroxyl radicals in the atmosphere**

**Brandon Bottorff et al.**

*Correspondence to:* Philip S. Stevens ([pstevens@indiana.edu](mailto:pstevens@indiana.edu))

The copyright of individual parts of the supplement might differ from the article licence.

**Table S1:** Summary of figures of merit for the LP/LIF instrument

|                                                     | <i>OH Sensitivity (<math>R_{OH}</math>)</i><br><i>counts <math>s^{-1} / (cm^{-3} mW)</math></i> | <i>Photofragmentation</i><br><i>Efficiency (PE)</i> | <i>HONO limit of</i><br><i>detection</i> | <i>OH limit of</i><br><i>detection</i>        |
|-----------------------------------------------------|-------------------------------------------------------------------------------------------------|-----------------------------------------------------|------------------------------------------|-----------------------------------------------|
| <i>Outdoor measurements</i><br><i>(Section 3.1)</i> | $3 \times 10^{-8}$                                                                              | 0.25%                                               | 18 ppt (10 min)                          | $\sim 5 \times 10^5 \text{ cm}^{-3}$ (60 min) |
| <i>Indoor measurements</i><br><i>(Section 3.2)</i>  | $2.75 \times 10^{-8}$                                                                           | 0.34%                                               | 9 ppt (10 min)                           | $\sim 7 \times 10^5 \text{ cm}^{-3}$ (60 min) |

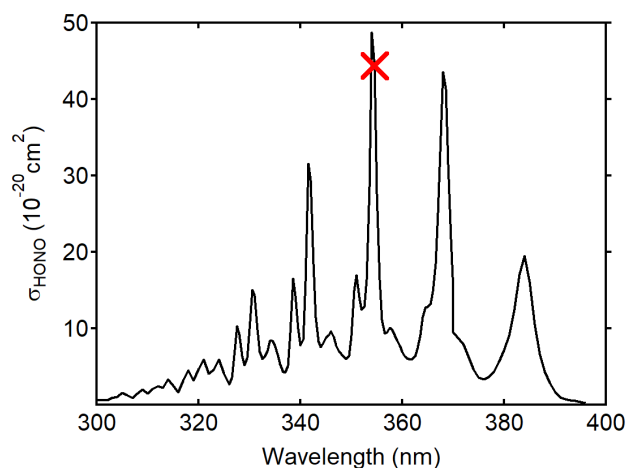

**Figure S1:** Absorption cross section of HONO with the 355-nm emission from the third harmonic of the Nd:YAG laser highlighted.

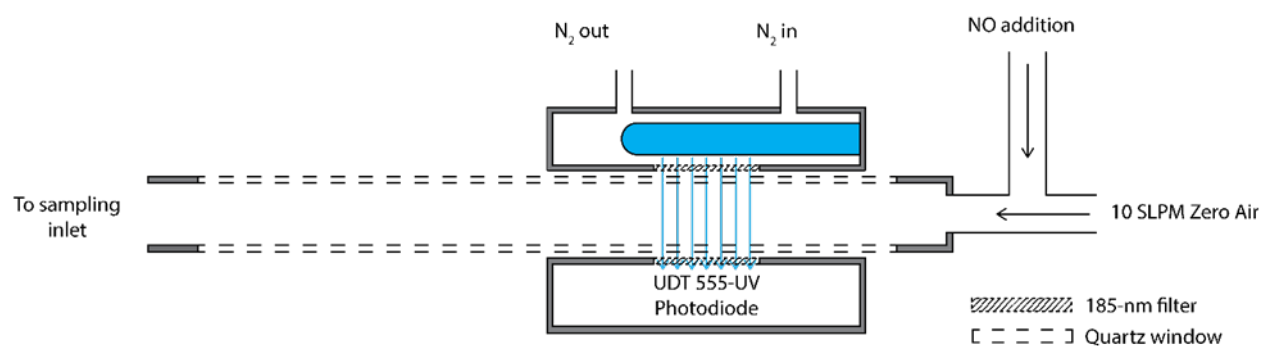

**Figure S2:** Schematic diagram of the water vapor photolysis calibration source.

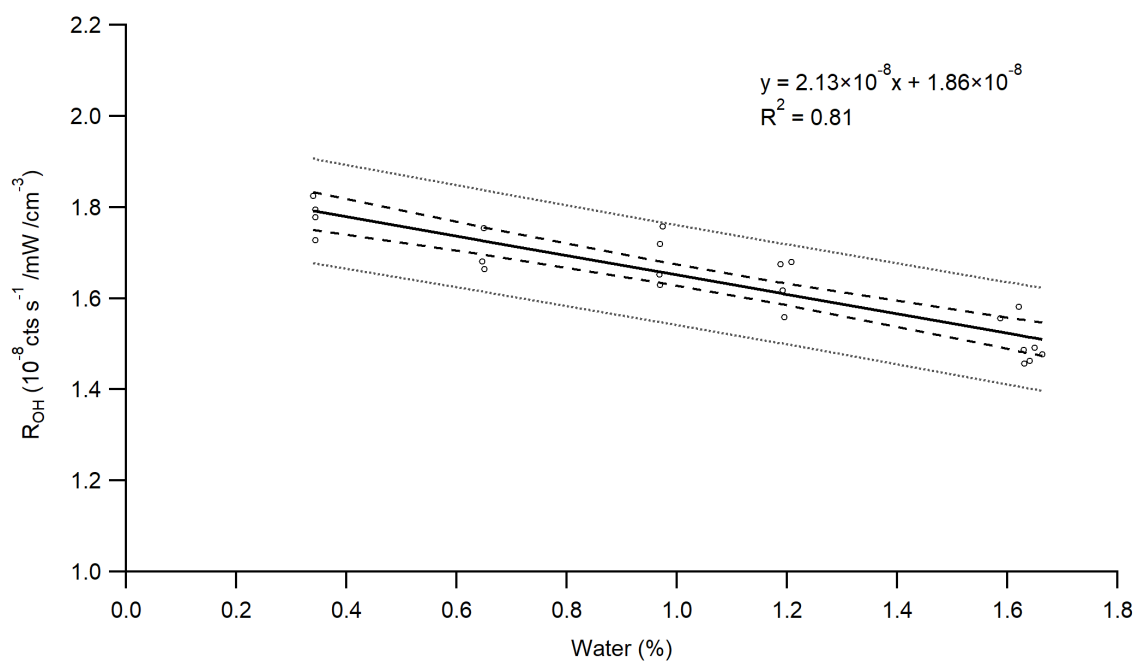

**Figure S3:** Plot of instrumental sensitivity to OH ( $R_{OH}$ ) dependence on water vapor. The dashed lines represent a 95% linear fit confidence interval and the dotted lines represent a 95% prediction interval.
